# Supplementary material for: Early Administration of Bamlanivimab in Combination with Etesevimab Increases the Benefits of COVID-19 Treatment: Real-World Experience from the Liguria Region
Source: MDPI journal article supplement (doi:10.3390/jcm10204682), 2021-10-13
Supplement: s1 [file s1]

# SUPPLEMENTARY MATERIAL

**Table S1. Description of patients who died after BEC infusion.**

| <b>Age (years)/ sex</b> | <b>Underling conditions</b>                                                                    | <b>Reason for hospital admission</b>                                                    | <b>Time elapsed between COVID-19 diagnosis and BEC infusion</b> | <b>Development of severe/critical illness</b> | <b>Period of completed recovery between Covid-19 and death</b> | <b>Ultimate cause of death.</b> |
|-------------------------|------------------------------------------------------------------------------------------------|-----------------------------------------------------------------------------------------|-----------------------------------------------------------------|-----------------------------------------------|----------------------------------------------------------------|---------------------------------|
| 89/M                    | NYHA class III heart failure; prostatic cancer; Alzheimer's disease                            | Acute heart failure with pulmonary edema.                                               | 1 day                                                           | No                                            | No                                                             | Acute kidney injury             |
| 89/M                    | Dementia associated with Parkinson's disease; COPD                                             | Left hip fracture due to accidental fall.                                               | 1 day                                                           | Yes                                           | No                                                             | Covid-19 related death          |
| 87/F                    | Stage IV Hodgkin lymphoma receiving palliative care; Hypertension                              | Rectorrhagia due to thrombocytopenia.                                                   | 1 day                                                           | No                                            | No                                                             | Advanced hematological disease  |
| 85/F                    | Heart failure; acute ischemic stroke                                                           | New episode of high heart rate atrial fibrillation associated with acute heart failure. | 1 day                                                           | No                                            | No                                                             | Refractory heart failure        |
| 83/M                    | Gastric cancer with peritoneal carcinomatosis, chemotherapy; Cerebrovascular disease; Dementia | Abdominal pain                                                                          | 0                                                               | No                                            | Yes (death occurred 30 days after Covid-19 diagnosis)          | Advanced gastric cancer         |
